# Supplementary material for: Comparison of community-based HIV counselling and testing (CBCT) through index client tracing and other modalities: Outcomes in 13 South African high HIV prevalence districts by gender and age
Source: PubMed Central journal article supplement (PMC6730921; doi:10.1371/journal.pone.0221215), 2019-09-06
Supplement: pone.0221215.s001.pdf [file pone.0221215.s001.pdf]

# Adult INFORMED CONSENT for HIV COUNSELLING & TESTING SERVICES

## CLIENT INFORMATION

|                  |       |   |       |   |        |                |              |   |              |   |                   |                      |  |        |  |         |  |
|------------------|-------|---|-------|---|--------|----------------|--------------|---|--------------|---|-------------------|----------------------|--|--------|--|---------|--|
| Testing Modality | HBHTS |   | MBHTS |   | WP-HTS |                | Twilight HTS |   | Index HTS    |   | Test Type:        | Individual           |  | Couple |  | Family  |  |
| Client Name:     | Name: |   |       |   |        | Surname:       |              |   |              |   |                   |                      |  |        |  |         |  |
| ID Number:       |       |   |       |   |        |                |              |   |              |   |                   |                      |  |        |  |         |  |
| Sex:             | M     | F | Age   |   |        | Testing place: | District     |   | Sub-district |   | Testing site name |                      |  |        |  |         |  |
| Date of test     | D     | D | M     | M | Y      | Y              | Y            | Y | Rise member: | Y | N                 | Name of club/ school |  |        |  | Card No |  |

I Hereby give signed consent to: (Tick Yes or No)

Yes No

- Be tested for HIV including CD4
- A home visit by a Health Care Worker who will provide HCT to my family
- Allow FPD to verify that i have reached the referral facility
- Be contacted telephonically from FPD's call centre on any of the numbers supplied below.

Cellular phone no:

Alternative number:

I have been informed and I have understood that: (My counsellor has explained the following)

- All my test results and health information will be handled with strict confidence and will only be shared with reputable health care providers in the best interest of my health
- All topics discussed before, during and after the session, as well as during the process of Data Management, are equally treated as confidential.
- I understand, and have given my consent that the data might be used for reseach without disclosing my name or personal information.

Signature: Client

Signature: HCT Provider

Right Thumb Print: Client

Date

\*HBHTS=Homebased HTS,MBHTS= Mobile HTS, WP HTS=Workplace HTS\*

Sponsored by

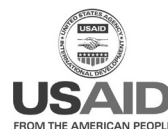

A project of

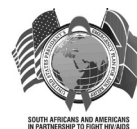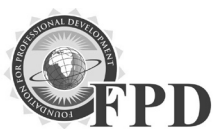

|                         |                            |                            |                   |            |                          |               |                          |                |                          |           |                          |
|-------------------------|----------------------------|----------------------------|-------------------|------------|--------------------------|---------------|--------------------------|----------------|--------------------------|-----------|--------------------------|
| First Ever test         | <input type="checkbox"/> Y | <input type="checkbox"/> N | Date of last test | < 6 months | <input type="checkbox"/> | 6 - 12 months | <input type="checkbox"/> | 13 - 24 months | <input type="checkbox"/> | > 2 years | <input type="checkbox"/> |
| Result of last HIV test | Negative                   |                            | Positive          |            | Don't Know               |               |                          |                |                          |           |                          |

**TB Screening**

| Yes                      | No                       | Have you had/been:                                                        |
|--------------------------|--------------------------|---------------------------------------------------------------------------|
| <input type="checkbox"/> | <input type="checkbox"/> | Cough(ing) for longer than 2 weeks                                        |
| <input type="checkbox"/> | <input type="checkbox"/> | Coughing up blood in your sputum                                          |
| <input type="checkbox"/> | <input type="checkbox"/> | Sudden unintentional/unexplained weight loss                              |
| <input type="checkbox"/> | <input type="checkbox"/> | Night sweats for longer than 2 weeks                                      |
| <input type="checkbox"/> | <input type="checkbox"/> | Fever for longer than 2 weeks                                             |
| <input type="checkbox"/> | <input type="checkbox"/> | in close contact with someone who has been coughing for more than 2 weeks |

**STI Screening**

| Yes                      | No                       | Did/ Do you have:                                 |
|--------------------------|--------------------------|---------------------------------------------------|
| <input type="checkbox"/> | <input type="checkbox"/> | unprotected sex with HIV and STI suspect          |
| <input type="checkbox"/> | <input type="checkbox"/> | abnormal or smelly discharge from vagina or penis |
| <input type="checkbox"/> | <input type="checkbox"/> | abnormal bleeding from vagina or penis            |
| <input type="checkbox"/> | <input type="checkbox"/> | experiencing pain during sex / when passing urine |
| <input type="checkbox"/> | <input type="checkbox"/> | experiencing pain during sex / when passing urine |

**Pregnancy status**

| Yes                      | No                       | Have you:                                |
|--------------------------|--------------------------|------------------------------------------|
| <input type="checkbox"/> | <input type="checkbox"/> | Missed your last normal periods          |
| <input type="checkbox"/> | <input type="checkbox"/> | Been using any form contraception        |
| <input type="checkbox"/> | <input type="checkbox"/> | Had unprotected sex in the last 3 months |

**Screened for non communicable diseases**

| Yes                      | No                       | Results                                                                                                                                         |                          |                          |          |                          |
|--------------------------|--------------------------|-------------------------------------------------------------------------------------------------------------------------------------------------|--------------------------|--------------------------|----------|--------------------------|
| <input type="checkbox"/> | <input type="checkbox"/> | Blood sugar <input type="text"/>                                                                                                                |                          |                          |          |                          |
| <input type="checkbox"/> | <input type="checkbox"/> | Blood pressure <input type="text"/>                                                                                                             |                          |                          |          |                          |
| <input type="checkbox"/> | <input type="checkbox"/> | PAP smear <table border="1"><tr><td>Normal</td><td><input type="checkbox"/></td><td>Abnormal</td><td><input type="checkbox"/></td></tr></table> | Normal                   | <input type="checkbox"/> | Abnormal | <input type="checkbox"/> |
| Normal                   | <input type="checkbox"/> | Abnormal                                                                                                                                        | <input type="checkbox"/> |                          |          |                          |

**Contraceptive Offered**

|      |                          |     |                          |          |                          |
|------|--------------------------|-----|--------------------------|----------|--------------------------|
| Pill | <input type="checkbox"/> | IUD | <input type="checkbox"/> | Implants | <input type="checkbox"/> |
|------|--------------------------|-----|--------------------------|----------|--------------------------|

**Circumcision**

| Yes                      | No                       | Are you circumcised |
|--------------------------|--------------------------|---------------------|
| <input type="checkbox"/> | <input type="checkbox"/> |                     |

**HIV Screening test:**

|              |                      |         |                      |             |                      |             |              |                          |          |                          |         |                          |
|--------------|----------------------|---------|----------------------|-------------|----------------------|-------------|--------------|--------------------------|----------|--------------------------|---------|--------------------------|
| Name of test | <input type="text"/> | Lot No. | <input type="text"/> | Expiry date | <input type="text"/> | Test Result | Non reactive | <input type="checkbox"/> | Reactive | <input type="checkbox"/> | Invalid | <input type="checkbox"/> |
|--------------|----------------------|---------|----------------------|-------------|----------------------|-------------|--------------|--------------------------|----------|--------------------------|---------|--------------------------|

**HIV Confirmatory**

|              |                      |         |                      |             |                      |             |              |                          |          |                          |         |                          |
|--------------|----------------------|---------|----------------------|-------------|----------------------|-------------|--------------|--------------------------|----------|--------------------------|---------|--------------------------|
| Name of test | <input type="text"/> | Lot No. | <input type="text"/> | Expiry date | <input type="text"/> | Test Result | Non reactive | <input type="checkbox"/> | Reactive | <input type="checkbox"/> | Invalid | <input type="checkbox"/> |
|--------------|----------------------|---------|----------------------|-------------|----------------------|-------------|--------------|--------------------------|----------|--------------------------|---------|--------------------------|

**Final Results**

|          |                          |          |                          |               |                          |          |                          |          |                          |         |                          |                 |                            |                            |
|----------|--------------------------|----------|--------------------------|---------------|--------------------------|----------|--------------------------|----------|--------------------------|---------|--------------------------|-----------------|----------------------------|----------------------------|
| Negative | <input type="checkbox"/> | Positive | <input type="checkbox"/> | Indeterminate | <input type="checkbox"/> | Cord neg | <input type="checkbox"/> | Cord pos | <input type="checkbox"/> | Discord | <input type="checkbox"/> | Post counselled | <input type="checkbox"/> Y | <input type="checkbox"/> N |
|----------|--------------------------|----------|--------------------------|---------------|--------------------------|----------|--------------------------|----------|--------------------------|---------|--------------------------|-----------------|----------------------------|----------------------------|

**Couple final results**

|                 |                          |            |                          |     |                          |     |                          |                      |                          |
|-----------------|--------------------------|------------|--------------------------|-----|--------------------------|-----|--------------------------|----------------------|--------------------------|
| Key populations | <input type="checkbox"/> | Sex worker | <input type="checkbox"/> | MSM | <input type="checkbox"/> | IDU | <input type="checkbox"/> | Client of sex worker | <input type="checkbox"/> |
|-----------------|--------------------------|------------|--------------------------|-----|--------------------------|-----|--------------------------|----------------------|--------------------------|

|                |                            |                            |             |                            |                            |         |                      |
|----------------|----------------------------|----------------------------|-------------|----------------------------|----------------------------|---------|----------------------|
| Known positive | <input type="checkbox"/> Y | <input type="checkbox"/> N | Ever on ART | <input type="checkbox"/> Y | <input type="checkbox"/> N | Comment | <input type="text"/> |
|----------------|----------------------------|----------------------------|-------------|----------------------------|----------------------------|---------|----------------------|

**Number of Condoms distributed**

|      |                      |        |                      |
|------|----------------------|--------|----------------------|
| Male | <input type="text"/> | Female | <input type="text"/> |
|------|----------------------|--------|----------------------|

**Number of Lubricants distributed**

|            |                      |
|------------|----------------------|
| Lubricants | <input type="text"/> |
|------------|----------------------|

|           |                          |      |                          |     |                          |     |                          |         |                          |    |                          |     |                          |                 |                          |     |                          |                 |                          |
|-----------|--------------------------|------|--------------------------|-----|--------------------------|-----|--------------------------|---------|--------------------------|----|--------------------------|-----|--------------------------|-----------------|--------------------------|-----|--------------------------|-----------------|--------------------------|
| Referrals | <input type="checkbox"/> | VMMC | <input type="checkbox"/> | ANC | <input type="checkbox"/> | GBV | <input type="checkbox"/> | Pre PEP | <input type="checkbox"/> | TB | <input type="checkbox"/> | STI | <input type="checkbox"/> | Family Planning | <input type="checkbox"/> | ART | <input type="checkbox"/> | Social Services | <input type="checkbox"/> |
|-----------|--------------------------|------|--------------------------|-----|--------------------------|-----|--------------------------|---------|--------------------------|----|--------------------------|-----|--------------------------|-----------------|--------------------------|-----|--------------------------|-----------------|--------------------------|

**Other prevention services:**

|                   |                      |
|-------------------|----------------------|
| Referral Facility | <input type="text"/> |
|-------------------|----------------------|

|               |                            |                            |
|---------------|----------------------------|----------------------------|
| Index consent | <input type="checkbox"/> Y | <input type="checkbox"/> N |
|---------------|----------------------------|----------------------------|

|             |                      |          |                      |                |                      |
|-------------|----------------------|----------|----------------------|----------------|----------------------|
| HTS reg No. | <input type="text"/> | Page No. | <input type="text"/> | Client row No. | <input type="text"/> |
|-------------|----------------------|----------|----------------------|----------------|----------------------|

Sponsored by

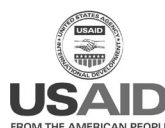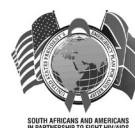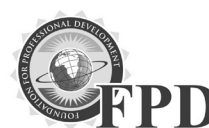

A Project of
