# Supplementary material for: Comparison of community-based HIV counselling and testing (CBCT) through index client tracing and other modalities: Outcomes in 13 South African high HIV prevalence districts by gender and age
Source: PLoS One. 2019 Sep 6;14(9):e0221215. doi: 10.1371/journal.pone.0221215 (PMC6730921; doi:10.1371/journal.pone.0221215)
Supplement: S2 Table — (XLSX) [file pone.0221215.s003.xlsx]

## Sheet: S2 Table
S2 Table. HIV positivity by modality, year, gender and age group
		TOTAL (Year 1 and 2)									Year 1									Year 2
		Total			Other modalities			Index			Total			Other modalities			Index			Total			Other modalities			Index
		N	%	95CI%	N	%	95CI%	N	%	95CI%	N	%	95CI%	N	%	95CI%	N	%	95CI%	N	%	95CI%	N	%	95CI%	N	%	95CI%
	Total HIV Positive	94984	7.40692	7.4-75	89864	7.29061	7.3-7.4	5120	10.2875	10.0-10.6	43327	6.56121	6.5-6.6	42171	6.50732	6.5-6.6	1156	9.40143	8.9-9.9	51657	8.30474	8.2-8.4	47693	8.159	8.1-8.2	3964	10.5783	10.3-10.9
	Gender:
	Male	37235	6.24521	6.2-6.3	35152	6.10203	6.0-6.2	2083	9.5	9.1-9.9	16756	5.46681	5.4-5.5	16319	5.41569	5.3-5.5	437	8.44281	7.7-9.2	20479	7.0236	6.9-7.1	18833	6.85477	6.8-7.0	1646	9.77957	9.3-10.2
	Female	57749	8.4	8.4-8.5	54712	8.33352	8.3-8.4	3037	10.9	10.6-11.3	26571	7.50918	7.4-7.6	25852	7.45601	7.4-7.5	719	10.0983	9.4-10.8	31178	9.43518	9.3-9.5	28860	9.31563	9.2-9.4	2318	11.2295	10.8-11.7
	Total	94984	7.43298	7.4-7.5	89864	7.29061	7.2-7.3	5120	10.3	10.0-10.6	43327	6.56121	6.5-6.6	42171	6.50732	6.5-6.6	1156	9.40143	8.9-9.9	51657	8.30474	8.2-8.4	47693	8.159	8.1-8.2	3964	10.5783	10.3-10.9
	HIV Positivity by age group
	Age
	1-4 years	481	1.28927	1.2-1.4	381	1.18621	1.1-1.3	100	2	1.6-2.4	280	1.45963	1.3-1.6	250	1.37878	1.2-1.6	30	2.85442	1.9-4.0	201	1.1189	1.0-1.4	131	0.936584	0.8-1.1	70	1.76012	1.4-2.2
	5-9 years	576	1.53677	1.4-1.7	462	1.46699	1.3-1.6	114	1.9	1.6-2.3	338	1.8176	1.6-2.0	300	1.73521	1.6-1.9	38	2.90742	2.1-4.0	238	1.25594	1.1-1.4	162	1.14052	1.0-1.3	76	1.60135	1.3-2.0
	10-14 years	934	1.97811	1.9-2.1	824	1.95238	1.8-2.1	110	2.26878	1.9-2.8	531	2.14294	2.0-2.3	507	2.13915	2.0-2.3	24	2.22635	1.4-3.3	403	1.81327	1.6-2.0	317	1.71314	1.5-1.9	86	2.31121	1.9-2.8
	15-19 years	5091	3.1	3.1-3.2	4887	3.12009	3.0-3.2	204	3.8	3.3-4.3	2684	3.01838	2.9-3.1	2613	2.98974	2.9-3.1	71	4.66185	3.7-5.8	2407	3.29185	3.2-3.4	2274	3.28466	3.2-3.4	133	3.4199	2.9-4.0
	20-24 years	14632	5.94785	5.8-6.0	13824	5.71994	5.6-5.8	808	12.5	11.7-13.3	6729	5.10752	5.0-5.2	6544	5.03102	4.9-5.2	185	11.0514	9.6-12.7	7903	6.78818	6.6-6.9	7280	6.52283	6.4-6.7	623	12.9387	12.0-13.9
	25-49 years	64116	10.1835	10.1-10.3	60764	9.95894	9.9-10.0	3352	18.1	17.6-18.7	28427	9.1901	9.1-9.3	27729	9.09664	9.0-9.2	698	15.5284	14.5-16.6	35689	11.177	11.1-11.3	33035	10.8199	10.7-10.9	2654	18.9707	18.3-19.6
	50+ years	9154	7.5	7.4-7.7	8722	7.3711	7.2-7.5	432	12.3	11.3-13.5	4338	6.39804	6.2-6.6	4228	6.34511	6.2-6.5	110	9.41781	7.8-11.2	4816	8.9139	8.7-9.2	4494	8.69363	8.5-8.9	322	13.7901	12.4-15.3
	Total	94984	7.43298	7.4-7.5	89864	7.29061	7.2-7.3	5120	9.98986	10.0-10.6	43327	6.56121	6.5-6.6	42171	6.50732	6.5-6.7	1156	9.40143	8.9-9.9	51657	8.30474	8.2-8.4	47693	8.159	8.1-8.2	3964	10.5783	10.3-10.9
	HIV Positivity by age group and gender
	Males:
	1-4 years	245	1.3589	1.2-1.5	184	1.18488	1.0-1.4	61	2.45333	1.9-3.2	134	1.44662	1.2-1.7	122	1.39158	1.2-1.7	12	2.41935	1.3-4.2	111	1.27119	1.0-1.5	62	0.916888	0.7-1.2	49	2.48731	1.8-3.3
	5-9 years	291	1.63193	1.4-1.8	239	1.59898	1.4-1.8	52	1.8	1.3-2.3	173	1.95768	1.7-2.3	154	1.87713	1.6-2.2	19	3.00158	1.8-4.6	118	1.30618	1.1-1.6	85	1.26057	1.0-1.6	33	1.43979	1.0-2.0
	10-14 years	403	1.79735	1.6-2.0	351	1.74427	1.6-1.9	52	2.3	1.7-3.0	225	1.94166	1.7-2.2	210	1.89257	1.7-2.16	15	3.04878	1.7-5.0	178	1.65305	1.4-1.9	141	1.56198	1.3-1.8	37	2.12522	1.5-2.9
	15-19 years	1241	1.75927	1.7-1.9	1196	1.74392	1.7-1.8	45	2	1.5-2.7	638	1.67586	1.5-1.8	629	1.67868	1.6-1.8	9	1.5	0.6-2.8	603	1.84268	1.7-2.0	567	1.82251	1.7-2.0	36	2.23187	1.6-3.1
	20-24 years	4046	3.81135	3.7-3.9	3817	3.64176	3.5-3.8	229	8.7	7.6-9.8	1665	2.94279	2.8-3.1	1632	2.91668	2.8-3.1	33	5.28	3.7-7.4	2381	4.67991	4.5-4.9	2185	4.47214	4.3-4.7	196	9.70778	8.5-11.1
	25-49 years	27034	8.77214	8.7-8.9	25564	8.52443	8.4-8.6	1470	17.8	17.0-18.7	12075	7.85248	7.7-8.0	11766	7.7492	7.6-7.9	309	15.9443	14.3-17.7	14959	9.6918	9.5-9.8	13798	9.31945	9.2-9.5	1161	18.4549	17.5-19.4
	50+ years	3975	7.4	7.2-7.7	3801	7.28328	7.1-7.5	174	13.4	11.6-15.4	1846	6.50137	6.2-6.8	1806	6.44954	6.2-6.7	40	10.2041	7.4-13.6	2129	8.48511	8.1-8.8	1995	8.24857	7.9-8.6	134	14.8066	12.6-17.3
	Total	37235	6.24521	6.2-6.3	35152	6.10203	6.0-6.2	2083	9.5	9.1-9.9	16756	5.46681	5.4-5.5	16319	5.41569	5.3-5.5	437	8.44281	7.7-9.2	20479	7.0236	6.9-7.1	18833	6.85477	6.8-7.0	1646	9.77957	9.3-10.2
	Females:
	1-4 years	236	1.22332	1.1-1.4	197	1.18746	1.0-1.4	39	1.5	1.1-2.1	146	1.47177	1.2-1.7	128	1.36679	1.1-1.6	18	3.24324	1.9-5.1	90	0.97487	0.8-1.2	69	0.955017	0.7-1.2	21	1.04634	0.6-1.6
	5-9 years	285	1.4	1.3-1.6	223	1.34776	1.2-1.5	62	2	1.5-2.5	165	1.69075	1.4-2.0	146	1.60704	1.4-1.9	19	2.81899	1.7-4.4	120	1.21029	1.0-1.5	77	1.03203	0.8-1.3	43	1.75224	1.3-2.4
	10-14 years	531	2.2	2.0-2.3	473	2.14202	2.0-2.3	58	2.3	1.7-2.9	306	2.31976	2.1-2.6	297	2.35621	2.1-2.6	9	1.53584	0.7-2.9	225	1.96386	1.7-2.2	176	1.85713	1.6-2.2	49	2.47475	1.8-3.3
	15-19 years	3850	4.24461	4.1-4.4	3691	4.19198	4.1-4.3	159	5	4.2-5.8	2046	4.02344	3.9-4.2	1984	3.97364	3.8-4.2	62	6.71723	5.2-8.5	1804	4.46579	4.2-4.7	1707	4.47796	4.3-4.7	97	4.26186	3.5-5.2
	20-24 years	10586	7.5	7.4-7.7	10007	7.31137	7.2-7.5	579	15.1	13.9-16.2	5064	6.73691	6.6-6.9	4912	6.62718	6.4-6.8	152	14.49	12.4-16.8	5522	8.42462	8.2-8.6	5095	8.11952	7.9-8.3	427	15.2718	14.0-16.7
	25-49 years	37082	11.6	11.5-11.7	35200	11.3455	11.2-11.5	1882	18.4	17.6-19.1	16352	10.5124	10.4-10.7	15963	10.4339	10.2-10.6	389	15.2131	13.8-16.7	20730	12.5666	12.4-12.7	19237	12.2325	12.1-12.4	1493	19.3921	18.5-20.3
	50+ years	5179	7.6	7.4-7.8	4921	7.44039	7.2-7.6	258	11.7	10.4-13.1	2492	6.32359	6.1-6.6	2422	6.26941	27.1-29.0	70	9.02062	7.1-11.3	2687	9.28569	9.0-9.6	2499	9.08496	8.8-9.4	188	13.1469	11.4-15.0
	Total	57749	8.4	8.4-8.5	54712	8.33352	8.3-8.4	3037	10.9	10.6-11.3	26571	7.50918	7.4-7.6	25852	7.45601	7.4-7.5	719	10.0983	9.4-10.8	31178	9.43518	9.3-9.5	28860	9.31563	9.2-9.4	2318	11.2295	10.8-11.7
